# Supplementary material for: Genetic Diversity and Ecological Evaluation of Fluorescent Pseudomonads Isolated from the Leaves and Roots of Potato Plants
Source: PubMed Central journal article supplement (PMC4036014; doi:10.1264/jsme2.me11237), 2012-02-22
Supplement: 27_122_s1.pdf [file 27_122_s1.pdf]

1 **Figure S1 legends**

2

3 **Fig. S1.** Phylogenetic tree of 16S rRNA genes based on the representative sequences of  
4 operational taxonomic units (OTUs) for potato-associated fluorescent pseudomonads  
5 (FPs). The tree was constructed using the neighbor-joining method. The scale represents  
6 0.1 substitutions per site. The numbers at the nodes are the proportions of 1,000  
7 bootstrap resamplings, and values of <500 are not shown.

8

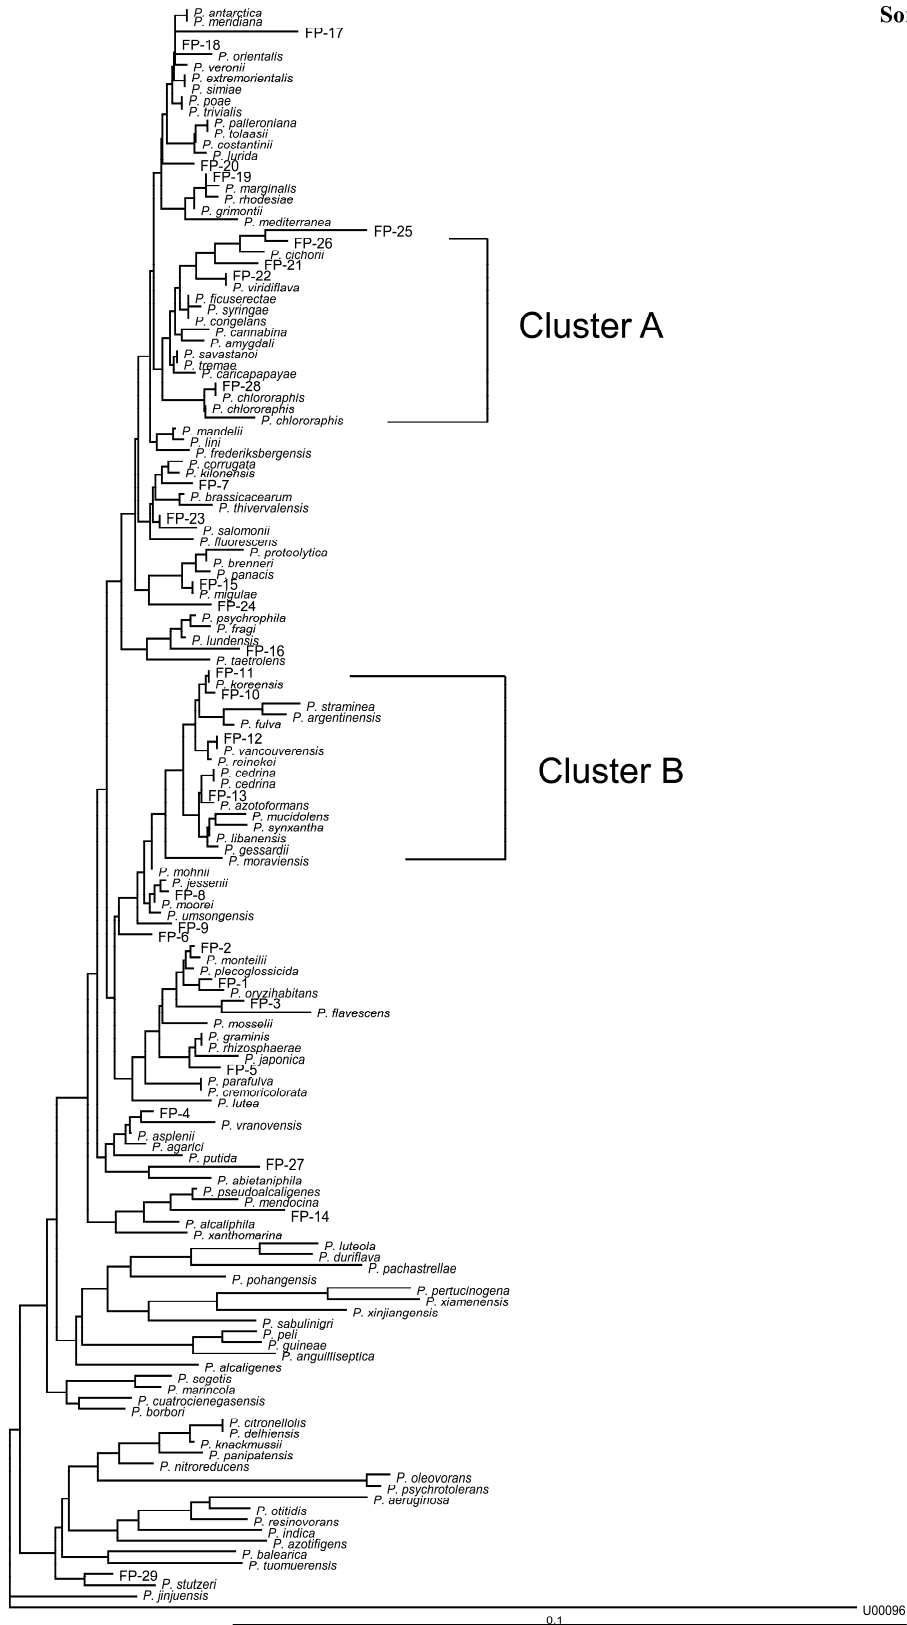

1 Fig. S1.

U00096

**Table S1.** Distribution of relative abundance of isolates for OTUs defined at 99% identity for potato-associated fluorescent pseudomonad

| OTUs             | Libraries |       |                    |      |      |      |      |      |      |                        |      |      |      |      |     |      |      |      |      |      |      |      |      |      |      |      |      |                              | Closest known species  | Acc. No. | Identity (%) |
|------------------|-----------|-------|--------------------|------|------|------|------|------|------|------------------------|------|------|------|------|-----|------|------|------|------|------|------|------|------|------|------|------|------|------------------------------|------------------------|----------|--------------|
|                  | Tissues   |       | Sites <sup>a</sup> |      |      |      |      |      |      | Varieties <sup>b</sup> |      |      |      |      |     |      |      |      |      |      |      |      |      |      |      |      |      |                              |                        |          |              |
|                  | Leaf      | Root  | FUK                | HOK  | IBA  | KAG  | KAN  | NAG  | BEN  | DAN                    | DEJ  | HAN  | HOK  | INK  | KTA | KTH  | KOG  | KON  | LOC  | MAY  | NIS  | NOR  | SAS  | SAY  | SNO  | TOY  | WAS  |                              |                        |          |              |
| FP-1             | 2.3**     | 3.6   | 0.0                | 5.7  | 4.3  | 0.0  | 31.8 | 29.2 | 31.8 | 1.5                    | 0.0  | 0.0  | 40.0 | 4.3  | 0.0 | 20.0 | 0.0  | 6.3  | 4.1  | 3.1  | 8.5  | 0.0  | 40.0 | 0.0  | 11.8 | 15.4 | 13.5 | <i>P. putida</i>             | EF204247               | 100      |              |
| FP-2             | 0.0       | 2.6** | 20.0               | 0.0  | 0.9  | 5.2  | 0.0  | 6.3  | 0.0  | 1.5                    | 20.0 | 0.0  | 0.0  | 0.0  | 0.0 | 0.0  | 0.0  | 0.0  | 0.0  | 0.0  | 5.5  | 0.0  | 0.0  | 0.0  | 0.0  | 0.0  | 0.0  | <i>P. putida</i>             | HQ166061               | 100      |              |
| FP-3             | 0.4       | 0.0   | 0.0                | 0.2  | 0.0  | 0.0  | 0.0  | 0.0  | 0.0  | 0.0                    | 0.0  | 0.0  | 0.0  | 0.0  | 0.0 | 0.0  | 0.0  | 0.0  | 0.0  | 3.1  | 0.0  | 0.0  | 0.0  | 0.0  | 0.0  | 0.0  | 0.0  | <i>P. fulva</i>              | EU594555               | 99       |              |
| FP-4             | 0.0       | 0.4   | 0.0                | 0.0  | 0.0  | 0.0  | 0.0  | 4.2  | 0.0  | 0.0                    | 0.0  | 0.0  | 0.0  | 0.0  | 0.0 | 0.0  | 0.0  | 0.0  | 0.0  | 1.2  | 0.0  | 0.0  | 0.0  | 0.0  | 0.0  | 0.0  | 0.0  | <i>P. putida</i>             | FJ010624               | 100      |              |
| FP-5             | 0.7       | 1.4   | 0.0                | 0.9  | 2.6  | 0.0  | 0.0  | 4.2  | 0.0  | 0.0                    | 0.0  | 0.0  | 0.0  | 0.0  | 0.3 | 0.0  | 0.0  | 0.0  | 0.5  | 6.3  | 1.2  | 0.0  | 0.0  | 0.0  | 0.0  | 3.8  | 0.0  | <i>P. putida</i>             | EF204244               | 100      |              |
| FP-6             | 1.1       | 4.0*  | 6.7                | 2.8  | 4.3  | 3.4  | 0.0  | 0.0  | 0.0  | 1.5                    | 6.7  | 0.0  | 0.0  | 8.7  | 0.0 | 0.0  | 7.4  | 18.8 | 1.8  | 12.5 | 2.4  | 0.0  | 0.0  | 0.0  | 5.9  | 0.0  | 2.7  | <i>P. fluorescens</i>        | AM293678               | 99       |              |
| FP-7             | 0.0       | 1.8*  | 6.7                | 1.3  | 0.9  | 0.0  | 0.0  | 2.1  | 0.0  | 1.5                    | 6.7  | 0.0  | 0.0  | 0.0  | 0.0 | 0.0  | 18.5 | 0.0  | 0.5  | 0.0  | 0.6  | 0.0  | 0.0  | 0.0  | 0.0  | 0.0  | 0.0  | <i>P. putida</i>             | FN313522               | 100      |              |
| FP-8             | 0.0       | 1.4*  | 0.0                | 0.4  | 2.6  | 0.9  | 0.0  | 2.1  | 0.0  | 0.0                    | 0.0  | 0.0  | 0.0  | 0.0  | 0.2 | 0.0  | 3.7  | 0.0  | 0.5  | 0.0  | 1.2  | 0.0  | 0.0  | 0.0  | 0.0  | 0.0  | 2.7  | <i>P. putida</i>             | AY973267               | 100      |              |
| FP-9             | 0.0       | 0.4   | 0.0                | 0.4  | 0.0  | 0.0  | 0.0  | 0.0  | 0.0  | 0.0                    | 0.0  | 0.0  | 0.0  | 0.0  | 0.0 | 0.0  | 3.7  | 0.0  | 0.0  | 0.0  | 0.0  | 0.0  | 0.0  | 2.4  | 0.0  | 0.0  | 0.0  | <i>P. putida</i>             | D85995                 | 99       |              |
| FP-10            | 7.2       | 8.8** | 20.0               | 8.9  | 25.9 | 24.1 | 13.6 | 18.8 | 13.6 | 29.4                   | 20.0 | 0.0  | 0.0  | 17.4 | 0.0 | 0.0  | 3.7  | 6.3  | 10.1 | 18.8 | 22.6 | 0.0  | 0.0  | 11.9 | 11.8 | 0.0  | 27.0 | <i>P. fluorescens</i>        | HQ166099               | 100      |              |
| FP-11            | 13.0      | 13.6  | 6.7                | 15.0 | 10.3 | 7.8  | 22.7 | 16.7 | 22.7 | 17.6                   | 6.7  | 23.5 | 20.0 | 43.5 | 0.2 | 0.0  | 0.0  | 18.8 | 11.0 | 9.4  | 10.4 | 4.8  | 0.0  | 19.0 | 11.8 | 26.9 | 8.1  | <i>P. putida</i>             | EF204240               | 100      |              |
| FP-12            | 0.0       | 7.8** | 0.0                | 3.5  | 12.9 | 5.2  | 0.0  | 4.2  | 0.0  | 13.2                   | 0.0  | 0.0  | 0.0  | 0.0  | 0.2 | 0.0  | 18.5 | 0.0  | 2.8  | 0.0  | 4.9  | 0.0  | 0.0  | 11.9 | 0.0  | 0.0  | 10.8 | <i>P. putida</i>             | DQ232745               | 100      |              |
| FP-13            | 5.4       | 4.2   | 0.0                | 4.8  | 6.0  | 4.3  | 9.1  | 0.0  | 9.1  | 10.3                   | 0.0  | 0.0  | 30.0 | 0.0  | 0.0 | 0.0  | 3.7  | 6.3  | 5.5  | 9.4  | 3.0  | 0.0  | 0.0  | 5.9  | 3.8  | 0.0  | 0.0  | <i>P. synxantha</i>          | EF204250               | 100      |              |
| FP-14            | 0.0       | 0.4   | 0.0                | 0.0  | 0.0  | 0.0  | 0.0  | 4.2  | 0.0  | 0.0                    | 0.0  | 0.0  | 0.0  | 0.0  | 0.0 | 0.0  | 0.0  | 0.0  | 0.0  | 1.2  | 0.0  | 0.0  | 0.0  | 0.0  | 0.0  | 0.0  | 0.0  | <i>P. gessardii</i>          | AY972280               | 97       |              |
| FP-15            | 0.0       | 0.6   | 0.0                | 0.2  | 0.9  | 0.0  | 0.0  | 2.1  | 0.0  | 1.5                    | 0.0  | 0.0  | 0.0  | 0.0  | 0.0 | 0.0  | 3.7  | 0.0  | 0.0  | 0.0  | 0.6  | 0.0  | 0.0  | 0.0  | 0.0  | 0.0  | 0.0  | 0.0                          | <i>P. migulae</i>      | HQ202819 | 99           |
| FP-16            | 0.0       | 0.2   | 0.0                | 0.2  | 0.0  | 0.0  | 0.0  | 0.0  | 0.0  | 0.0                    | 0.0  | 0.0  | 0.0  | 0.0  | 0.0 | 0.0  | 0.0  | 0.0  | 0.0  | 0.0  | 0.0  | 0.0  | 0.0  | 2.4  | 0.0  | 0.0  | 0.0  | <i>P. fragi</i>              | GU549487               | 99       |              |
| FP-17            | 1.8*      | 0.0   | 0.0                | 1.1  | 0.0  | 0.0  | 0.0  | 0.0  | 0.0  | 0.0                    | 0.0  | 0.0  | 0.0  | 0.0  | 0.0 | 0.0  | 0.0  | 0.0  | 2.3  | 0.0  | 0.0  | 0.0  | 0.0  | 0.0  | 0.0  | 0.0  | 0.0  | 0.0                          | <i>P. marginalis</i>   | GQ845121 | 98           |
| FP-18            | 12.8**    | 10.0  | 0.0                | 18.5 | 12.9 | 11.2 | 0.0  | 0.0  | 0.0  | 8.8                    | 0.0  | 47.1 | 10.0 | 8.7  | 0.2 | 60.0 | 0.0  | 6.3  | 21.6 | 12.5 | 7.9  | 4.8  | 0.0  | 14.3 | 23.5 | 26.9 | 21.6 | <i>P. marginalis</i>         | GQ845121               | 99       |              |
| FP-19            | 4.3*      | 1.4   | 0.0                | 1.5  | 0.0  | 10.3 | 0.0  | 0.0  | 0.0  | 1.5                    | 0.0  | 0.0  | 0.0  | 4.3  | 0.0 | 0.0  | 0.0  | 18.8 | 0.9  | 0.0  | 7.3  | 0.0  | 0.0  | 0.0  | 0.0  | 0.0  | 0.0  | 0.0                          | <i>P. marginalis</i>   | AY071916 | 100          |
| FP-20            | 0.0       | 4.8** | 33.3               | 8.3  | 11.2 | 12.9 | 0.0  | 6.3  | 0.0  | 11.8                   | 33.3 | 0.0  | 0.0  | 0.0  | 0.0 | 0.0  | 0.0  | 14.7 | 6.3  | 11.0 | 9.5  | 0.0  | 0.0  | 23.5 | 0.0  | 8.1  | 0.0  | <i>P. frederiksbergensis</i> | FJ796428               | 100      |              |
| FP-21            | 0.4       | 0.2   | 0.0                | 0.0  | 0.0  | 1.7  | 0.0  | 0.0  | 0.0  | 0.0                    | 0.0  | 0.0  | 0.0  | 0.0  | 0.0 | 0.0  | 0.0  | 0.0  | 0.0  | 1.2  | 0.0  | 0.0  | 0.0  | 0.0  | 0.0  | 0.0  | 0.0  | 0.0                          | <i>P. viridiflava</i>  | Z76671   | 98           |
| FP-22            | 4.9**     | 0.6   | 0.0                | 6.3  | 0.9  | 11.2 | 4.5  | 0.0  | 4.5  | 0.0                    | 0.0  | 0.0  | 0.0  | 8.7  | 0.0 | 0.0  | 11.1 | 0.0  | 5.0  | 0.0  | 7.9  | 38.1 | 0.0  | 14.3 | 0.0  | 0.0  | 0.0  | 0.0                          | <i>P. viridiflava</i>  | Z76671   | 100          |
| FP-23            | 0.0       | 9.4** | 0.0                | 9.2  | 1.7  | 0.0  | 13.6 | 0.0  | 13.6 | 0.0                    | 0.0  | 0.0  | 0.0  | 0.0  | 0.0 | 0.0  | 22.2 | 18.8 | 13.3 | 3.1  | 0.0  | 0.0  | 11.9 | 0.0  | 0.0  | 0.0  | 0.0  | 0.0                          | <i>P. mandelii</i>     | DQ377771 | 99           |
| FP-24            | 0.0       | 1.6*  | 0.0                | 1.7  | 0.0  | 0.0  | 0.0  | 0.0  | 0.0  | 0.0                    | 0.0  | 0.0  | 0.0  | 4.3  | 0.0 | 0.0  | 0.0  | 0.0  | 0.0  | 0.0  | 33.3 | 0.0  | 0.0  | 0.0  | 0.0  | 0.0  | 0.0  | 0.0                          | <i>P. putida</i>       | EF413074 | 98           |
| FP-25            | 8.7**     | 0.0   | 0.0                | 4.8  | 0.9  | 0.0  | 4.5  | 0.0  | 4.5  | 0.0                    | 0.0  | 11.8 | 0.0  | 0.0  | 0.0 | 20.0 | 0.0  | 0.0  | 2.3  | 12.5 | 0.0  | 0.0  | 60.0 | 0.0  | 5.9  | 23.1 | 2.7  | 0.0                          | <i>P. cichorii</i>     | Z76658   | 97           |
| FP-26            | 6.9**     | 0.0   | 0.0                | 4.1  | 0.0  | 0.0  | 0.0  | 0.0  | 0.0  | 0.0                    | 0.0  | 17.6 | 0.0  | 0.0  | 0.0 | 0.0  | 3.7  | 0.0  | 3.2  | 3.1  | 0.0  | 9.5  | 0.0  | 11.9 | 0.0  | 0.0  | 0.0  | 0.0                          | <i>P. cichorii</i>     | Z76658   | 98           |
| FP-27            | 0.0       | 0.2   | 0.0                | 0.0  | 0.9  | 0.0  | 0.0  | 0.0  | 0.0  | 0.0                    | 0.0  | 0.0  | 0.0  | 0.0  | 0.0 | 0.0  | 0.0  | 0.0  | 0.0  | 0.0  | 0.0  | 0.0  | 0.0  | 0.0  | 0.0  | 0.0  | 2.7  | 0.0                          | <i>P. fluorescens</i>  | AY947533 | 100          |
| FP-28            | 0.0       | 0.4   | 0.0                | 0.0  | 0.0  | 1.7  | 0.0  | 0.0  | 0.0  | 0.0                    | 0.0  | 0.0  | 0.0  | 0.0  | 0.0 | 0.0  | 0.0  | 0.0  | 0.0  | 1.2  | 0.0  | 0.0  | 0.0  | 0.0  | 0.0  | 0.0  | 0.0  | 0.0                          | <i>P. chlororaphis</i> | HM241942 | 100          |
| FP-29            | 0.0       | 0.2   | 6.7                | 0.0  | 0.0  | 0.0  | 0.0  | 0.0  | 0.0  | 0.0                    | 6.7  | 0.0  | 0.0  | 0.0  | 0.0 | 0.0  | 0.0  | 0.0  | 0.0  | 0.0  | 0.0  | 0.0  | 0.0  | 0.0  | 0.0  | 0.0  | 0.0  | 0.0                          | <i>P. montelii</i>     | EF600892 | 100          |
| No. <sup>c</sup> | 276       | 500   | 15                 | 459  | 116  | 116  | 22   | 48   | 22   | 68                     | 15   | 17   | 10   | 23   | 11  | 5    | 27   | 16   | 218  | 32   | 164  | 21   | 5    | 42   | 17   | 26   | 37   |                              |                        |          |              |

<sup>a</sup>Sampling sites are abbreviated as following; FUK, Fukuoka; HOK, Hokkaido; IBA, Ibaraki; KAG, Kagoshima; KAN, Kanagawa; NAG, Nagasaki.<sup>b</sup>Varieties are abbreviated as follows; BEN, Beniazuma; DAN, Danshaku; DEJ, Dejima; HAN, Hanashibetsu; HOK, Hokkaikogane; INK, Inkanohitomi; KTA, Kitaakari; KTH, Kitahime; KOG, Koganemaru; KON, Konafubuki; LOC, Local lines; MAY, Mayqueen; NIS, Nishiyutaka; NOR, Norin No. 1; SAS, Sashii; SAY, Sayaakane; SNO, Snowden; TOY, Toyoshiro; WAS, Waseshiro.<sup>c</sup>Numbers of isolates analyzed for each column.
